# Supplementary material for: Bead-enriched catalyzed hairpin assembly for the flow cytometric detection of microRNA via FRET signal readout
Source: Royal Society of Chemistry journal article supplement (doi:10.1039/d3sd00287j), 2023-11-02
Supplement: d3sd00287j1.pdf [file d3sd00287j1.pdf]

## Electronic Supplementary Information

### **Bead-Enriched Catalyzed Hairpin Assembly for the Flow Cytometric Detection of microRNA *via* FRET signal readout**

Zhengkun Dong, Wenjiao Fan\*, Wei Ren, Chenghui Liu\*

Key Laboratory of Applied Surface and Colloid Chemistry, Ministry of Education;  
Key Laboratory of Analytical Chemistry for Life Science of Shaanxi Province;  
School of Chemistry & Chemical Engineering, Shaanxi Normal University, Xi'an  
710119 Shaanxi Province, P. R. China

Corresponding author

E-mail: [fanwj@snnu.edu.cn](mailto:fanwj@snnu.edu.cn), [liuch@snnu.edu.cn](mailto:liuch@snnu.edu.cn)

Phone/Fax: +86 29 81530859

#### **1. Experimental details**

**Standard procedures of the homogeneous CHA for miRNA analysis.** 100 pM H1 and 1 nM free H2 were mixed with different concentrations of let-7a in 100  $\mu$ L of  $4 \times$  SSPE buffer solution. The mixture was incubated at 37 °C for 3 hours to conduct CHA reaction. Finally, the FRET signal is detected by using fluorescence spectroscopy.

**Detection of let-7a level in total RNA extracted from cells.** The HepG2 and Hela cell lines were purchased from the cell bank of Chinese Academy of Sciences. And they were cultured in Dulbecco's modified Eagle's medium (DMEM, Life). All the media were supplemented with 10% fetal bovine serum (FBS), 100 U/mL penicillin, and 100  $\mu$ g/mL streptomycin at 37 °C under a humidified atmosphere containing 5% CO<sub>2</sub>. The total RNA sample was extracted from the cells by using of RNAiso for Small RNA Kit (Takara, China) according to the manufacturer's instructions. The amount of extracted total RNA was quantified with a Nanodrop 2000 UV-Vis Spectrophotometer (Thermo Fisher Scientific,

USA). The total RNA extracted from cells was subject to the standard procedures of the bead-enriched CHA for miRNA analysis procedures stated in the main text to quantitatively evaluate the level of let-7a.

**Quantification of let-7a in the total RNA by RT-PCR method.** The stem-loop reverse-transcription PCR (RT-PCR) protocol is referred to the methods in the literatures with some modifications. **Reverse transcription reaction:** The reverse transcription reaction was carried out in the mixture with 1  $\mu$ L target miRNA (or total small RNA sample), 1.2  $\mu$ L of RNase-free water, 1  $\mu$ L of 5  $\times$  RT buffer (50 mM Tris-HCl, 75 mM KCl, 3 mM MgCl<sub>2</sub>), 1  $\mu$ L of 2.5 mM dNTPs, 0.2  $\mu$ L of 200 U/ $\mu$ L ProtoScript II reverse transcriptase, 0.5  $\mu$ L of 1  $\mu$ M stem-loop RT-Probe (5'-GTCGTATCCAGTGCAGGGTCCGAGGTATTCGCACTGGATACGACA ACTA-3'), and 0.1  $\mu$ L of 40 U/ $\mu$ L RNase inhibitor. The 5  $\mu$ L mixture was treated with following conditions: 30 min at 16  $^{\circ}$ C, 30 min at 42  $^{\circ}$ C, 5 min at 85  $^{\circ}$ C and then held at 4  $^{\circ}$ C. **Quantitative real-time PCR analysis:** 5  $\mu$ L transcription product was added into the PCR reaction mixture with a final volume of 10  $\mu$ L. The PCR reaction mixture consists of 200 nM forward primer (5'-GCCGCTGAGGTAGTAGGTTGTA-3') and 200 nM reverse primer (5'-GTGCAGGGTCCGAGGT-3'), 250  $\mu$ M dNTPs, 0.4  $\times$  SYBR Green I, 0.5 U JumpStart<sup>TM</sup> Taq DNA Polymerase, and 1  $\times$  PCR buffer (10 mM Tris-HCl, 50 mM KCl, 1.5 mM MgCl<sub>2</sub>, and 0.001(w/v) gelatin, pH 8.3). The 10  $\mu$ L PCR reaction mixture was incubated in a StepOne Real-Time PCR System (Applied Biosystems, USA) according to the following thermal cycling conditions: hot start at 95  $^{\circ}$ C for 2 min, followed by 50 cycles of 95  $^{\circ}$ C for 15 s, and 60  $^{\circ}$ C for 1 min.

## 2. Nucleic acid sequences used in this work.

**Table S1.** DNA and RNA sequences used in the work

| Name         | Sequence from 5' to 3'                                                       |
|--------------|------------------------------------------------------------------------------|
| H1           | TAGGTTGT(FAM)ATAGTTCCATGTAGAACTATAACAACCTACTAC<br>CTCATTTCATTTTTTTTTT-Biotin |
| Free H2      | CCATGTGTAGATAGGTTGTATAGTTTCTACACATGGAACTATA-Cy3                              |
| Let-7a       | UGAGGUAGUAGGUUGUAUAGU                                                        |
| Let-7e       | UGAGGUAGGAGGUUGUAUAGU                                                        |
| Let-7f       | UGAGGUAGUAGAUUGUAUAGU                                                        |
| Let-7g       | UGAGGUAGUAGUUUGUACAGU                                                        |
| Let-7i       | UGAGGUAGUAGUUUGUGCUGU                                                        |
| microRNA-21  | UAGCUUAUCAGACUGAUGUUGA                                                       |
| microRNA-195 | UAGCAGCACAGAAAUAUUGGC                                                        |

FAM: 6-carboxyfluorescein; Cy3: Cyanine 3.

### 3. The detailed principle of miRNA-initiated CHA

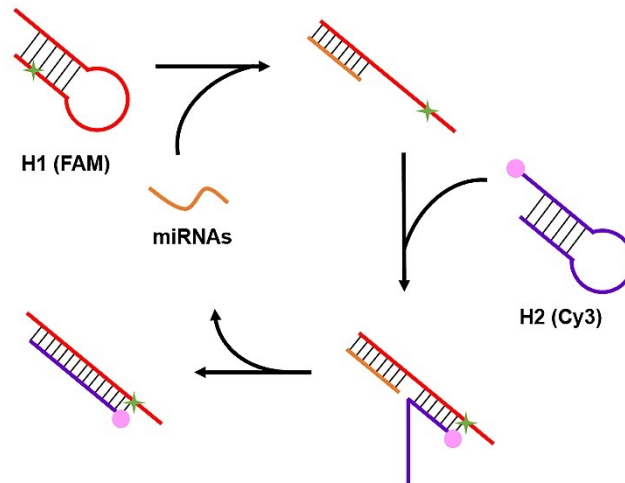

**Figure S1.** Schematic illustration of the detailed principle of miRNA-initiated CHA based on the toehold-mediated strand displacement.

#### 4. Detection results of let-7a with the proposed bead-enriched CHA assay by using $1.2 \times 10^5$ beads.

To evaluate the analytical performance of the proposed bead-enriched CHA assay, approximate  $1.2 \times 10^5$  beads are employed to analyze the concentration of let-7a. As shown in Figure S2, the FRET signal continuously rises with the concentration of let-7a increasing from 50 pM to 300 pM. Notably, as low as 50 pM let-7a-produced FRET signal can be well discriminated from the blank signal.

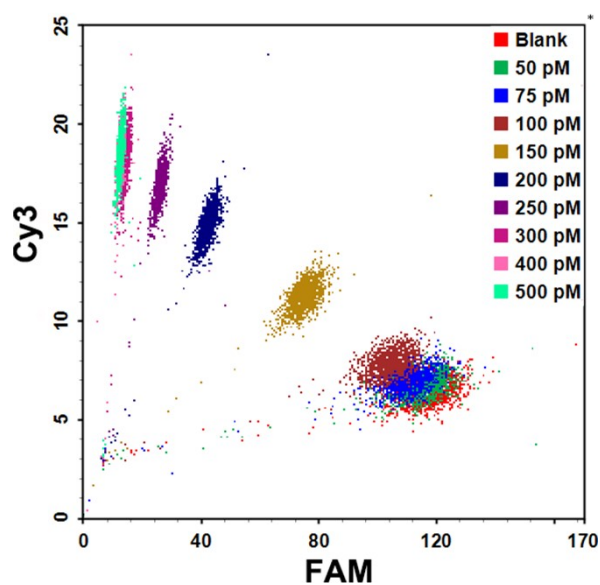

**Figure S2.** Fluorescence intensity of Cy3 vs. fluorescence intensity of FAM scattering plots of the beads in the presence of different concentration of let-7a by using  $1.2 \times 10^5$  beads.

**5. Fluorescence intensity of Cy3 vs. fluorescence intensity of FAM scattering plots of the beads in the presence of small concentration of let-7a by using  $2.4 \times 10^3$  beads.**

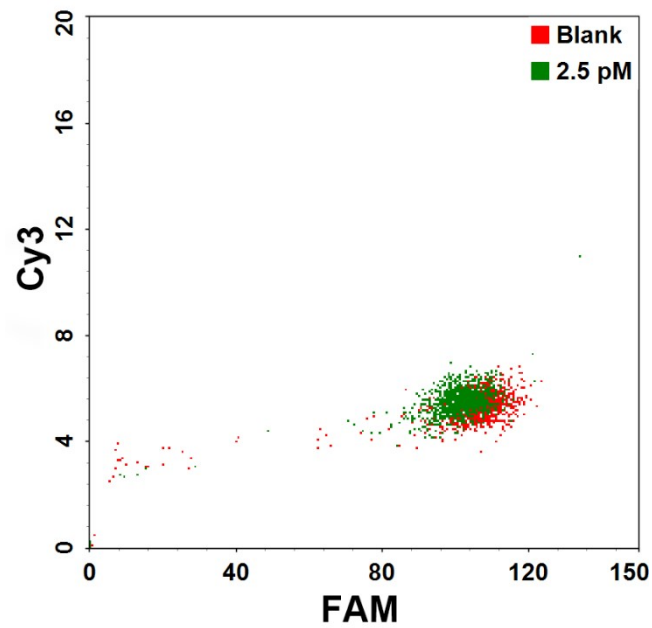

**Figure S3.** Fluorescence intensity of Cy3 vs. fluorescence intensity of FAM scattering plots of the beads in the presence of 0 and 2.5 pM of let-7a.

## 6. Calculation of the detection limit

In the Table S2, we provide the average FRET signal and standard deviation of nine parallel test results of the blank control. According to the  $3\sigma$  criterion and the slope of the calibration curve, the detection limit of let-7a is calculated to be 0.7 pM (Equation 1). Moreover, from another angle, if we interrogate the detection limit value by using 2.5 pM target (whose FRET signal can be clearly discriminated from that of blank control) as a point on the calibration curve in the linear range, according to the Equation 2, the detection limit is calculated to be 0.65 pM. These results are consistent.

$$\text{Detection limit} = \frac{3\sigma}{S} = \frac{3 * 0.00243}{0.0104} = 0.7 \text{ pM (Equation 1)}$$

$$\frac{3\sigma}{\lg(I_{Cy3}/I_{FAM})_{2.5 \text{ pM}} - \lg(I_{Cy3}/I_{FAM})_{\text{blank}}} = \frac{\text{Detection limit}}{2.5 \text{ pM}} \quad (\text{Equation 2})$$

**Table S2.** The relevant values for the datapoints produced by 0 (blank) and 2.5 pM let-7a.

| Let-7a concentration | $I_{Cy3}/I_{FAM}$ | $\lg(I_{Cy3}/I_{FAM})$ | Average of $\lg(I_{Cy3}/I_{FAM})$ | Standard deviation |
|----------------------|-------------------|------------------------|-----------------------------------|--------------------|
| 0 (blank, n=9)       | 0.05066           | -1.29534               | -1.29232                          | 0.00243            |
|                      | 0.05083           | -1.29390               |                                   |                    |
|                      | 0.05072           | -1.29479               |                                   |                    |
|                      | 0.05153           | -1.28796               |                                   |                    |
|                      | 0.05082           | -1.29395               |                                   |                    |
|                      | 0.05108           | -1.29174               |                                   |                    |
|                      | 0.05100           | -1.29240               |                                   |                    |
|                      | 0.05122           | -1.29056               |                                   |                    |
|                      | 0.05126           | -1.29024               |                                   |                    |
| 2.5 pM               | 0.05457           | -1.26305               | -1.26450                          | 0.00126            |
|                      | 0.05430           | -1.26522               |                                   |                    |
|                      | 0.05430           | -1.26523               |                                   |                    |

## 7. Comparison of different nucleic acid detection methods based on CHA

**Table S3.** Comparison of different nucleic acid detection methods based on CHA

| Sensing strategy                                                                       | Analytical technique for signal readout | Step of the experimental operation | Detection limit/The lowest detectable concentration |
|----------------------------------------------------------------------------------------|-----------------------------------------|------------------------------------|-----------------------------------------------------|
| The application of a three-arm nanostructure for nonenzymatic signal amplification     | Fluorescence <sup>S1</sup>              | one                                | 29.3 pM                                             |
| A method using a palindromic hybridization chain reaction combined with CHA            | Fluorescence <sup>S2</sup>              | two                                | 10 pM                                               |
| Based on cross-CHA on gold nanoparticles to generate cyclic amplification              | Fluorescence <sup>S3</sup>              | one                                | 74 pM                                               |
| A localized CHA-based DNA nanomachine                                                  | Fluorescence <sup>S4</sup>              | one                                | 58.1 pM                                             |
| Coupling CHA with magnetic bead-confined 3D DNA walking                                | Fluorescence <sup>S5</sup>              | two                                | 47.4 pM                                             |
| Combining CHA with the Luminex xMAP system                                             | Fluorescence <sup>S6</sup>              | two                                | 2 pM                                                |
| Coupling CHA with enzymatic repairing amplification                                    | Fluorescence <sup>S7</sup>              | two                                | 50 fM                                               |
| An electrochemical biosensor using localized DNA tetrahedron-assisted CHA              | electrochemical <sup>S8</sup>           | four                               | 21 aM                                               |
| Combining SERS techniques and CHA                                                      | SERS <sup>S9</sup>                      | three                              | 2.53 aM                                             |
| Coupling CHA with portable SERS reader                                                 | SERS <sup>S10</sup>                     | two                                | 84 fM                                               |
| Bead-enriched catalyzed hairpin assembly for the flow cytometric detection of microRNA | Fluorescence                            | one                                | 0.7 pM (this work)                                  |



## References

- S1.** E. Kim, J. Xu, J. Kim and H. Chun, *Analyst*, 2022, **147**, 1899-1905.
- S2.** C. Li, J. Zhang, Y. Gao, S. Luo and Z.-S. Wu, *ACS Sens.*, 2022, **7**, 601-611.
- S3.** P. Yang, H. Chen, Q. Zhu, Z. Chen, Z. Yang, R. Yuan, Y. Li and W. Liang, *Talanta*, 2022, **240**, 123219.
- S4.** J. Wu, Y. Tian, L. He, J. Zhang, Z. Huang, Z. Luo and Y. Duan, *Analyst*, 2021, **146**, 3041-3051.
- S5.** J. Yu, L. Qi, S. Zhao, X. Zhang, X. Shang, X. Hu, L. Chen, D. Wang, Y. Jiang and Y. Du, *Anal. Sens.*, 2023, e202300011.
- S6.** J. Wang, Y. Sun, C. Lau and J. Lu, *Anal. Bioanal. Chem.*, 2020, **412**, 3019-3027.
- S7.** C.-H. Zhang, Y. Tang, Y.-Y. Sheng, H. Wang, Z. Wu and J.-H. Jiang, *Chem. Commun.*, 2016, **52**, 13584-13587.
- S8.** Y. Zhang, W. Li, T. Ji, S. Luo, J. Qiu, B. Situ, B. Li, X. Zhang, T. Zhang, W. Wang, Y. Xiao, L. Zheng and X. Yan, *J. Nanobiotechnol.*, 2022, **20**, 503.
- S9.** S. Ge, G. Li, X. Zhou, Y. Mao, Y. Gu, Z. Li, Y. Gu and X. Cao, *Talanta*, 2022, **245**, 123478.
- S10.** W. Wang, Y. Li, A. Nie, G.-C. Fan and H. Han, *Analyst*, 2021, **146**, 848-854.
